# Supplementary material for: Serum lncRNA H19/miR-675 /PPARα expression before middle gestation and their associations with macrosomia risk in singleton pregnancies without gestational diabetes mellitus: a preliminary study
Source: PeerJ. 2026 Feb 16;14:e20793. doi: 10.7717/peerj.20793 (PMC12919319; doi:10.7717/peerj.20793)
Supplement: Supplemental Information 2 [file peerj-14-20793-s002.xlsx]

## Sheet: data-raw
subgroup	macro	blood_ID	H19	miR675	PPARα	TG	TC	HDL.C	LDL.C	sex	birthweight	preg_hypertension	GDM	age	ethni	parity	edu	preg_BMI	FBG	ges_wks	weight_inc	delivery	length	income	work	excise	sleep	drink	smoke	grain	nut	meat	seafood	bean	vegetable	egg	fruit	milk	acid	sample_wk
3	1	38	12.0908	1.03526	1.11	0.93	3.71	1.28	2.15	0	4200	0	0	23	0	0	2	24.7676	4.78	40	11.5	2	50	1	1	1	10	1	1	2	1	1	1	1	1	1	2	1	2	11
2	0	39	3.92391	2.04675	1.24	1.9	4.06	1.19	2.29	1	3350	0	0	27	1	1	1	21.4844	5.06	38	15	2	50	2	1	1	6.5	1	1	2	1	1	1	1	2	1	2	1	2	12
4	1	44	4.39237	0.948246	1.41	1.12	3	1.34	0.92	1	4300	0	0	41	0	1	1	19.9481	4.95	40	15	1	51	1	1	1	7	1	1	2	1	1	2	1	2	2	2	2	2	9
1	0	73	0	3.84593	0.62	1.33	4.98	1.93	2.59	0	3000	0	0	34	0	1	2	18.026	4.87	39	20.5	2	50	1	2	1	7	1	1	2	1	1	2	2	2	2	2	2	2	15
6	1	88	0.586417	1.99078	0.65	1.18	4.06	1.38	2.14	0	4200	0	0	25	0	0	2	19.5312	4.92	40	19.8	1	51	2	2	2	8.5	1	1	2	2	2	1	1	2	2	2	2	2	9
10	0	100	0.990658	2.37704	0.91	0.62	5.04	2.27	2.34	0	3400	0	0	26	0	0	2	20.6297	4.84	40	16.2	1	51	1	2	1	7	1	1	2	1	2	2	1	1	1	1	1	2	7
5	1	130	7.34451	1.30435	1.24	2.56	4.7	1.77	2.33	0	4050	0	0	28	0	1	1	22.0317	4.6	40	11	2	50	2	2	1	8	1	1	2	1	2	2	1	2	1	2	1	2	13
39	0	131	1.15736	1.17827	1.04799	0.9	4.39	1.65	2.29	1	3250	0	0	25	0	0	1	19.2837	4.09	39	15.5	1	50	1	2	1	8	1	1	2	1	1	1	1	1	1	2	1	2	9
5	0	139	17.9698	13.5167	1.9	1.87	6.07	2.24	3.44	0	3400	0	0	42	1	1	1	20.4294	4.84	39	14.6	1	50	2	2	1	8	1	1	2	1	1	1	2	2	1	2	1	2	13
9	1	154	4.93526	7.34451	0.7	1.85	4.2	1.49	2.37	1	4160	0	0	25	0	1	1	18.6709	4.7	40	19	1	51	2	2	1	8	1	1	2	1	1	1	1	2	1	2	2	2	11
37	0	183	0	1.10445	0.69832	1.81	4.93	1.86	2.64	1	3500	0	0	27	0	1	2	18.662	5.02	39	14	1	50	1	2	1	7	1	1	2	1	2	2	1	2	2	2	1	2	11
8	1	176	8.80761	3.16748	0.85	0.9	4.25	2.07	1.85	0	4065	0	0	31	0	0	2	20.3244	4.88	39	21	1	50	1	1	1	8	1	1	2	2	1	2	2	1	2	2	2	2	10
15	0	185	7.33886	1.45355	1.7	0.71	4.31	2.04	2.05	1	3850	0	0	30	0	0	1	20.0288	4.88	40	15	2	51	1	2	1	8	1	1	2	1	1	2	2	2	2	2	2	2	12
38	1	180	0.79523	0.607097	1.54474	1.52	5.03	1.88	2.8	1	4130	0	1	29	0	1	2	23.6244	5.08	39	14	1	51	2	1	1	10	1	1	2	1	2	1	1	2	2	1	1	2	11
38	0	255	3.19196	2.78949	0.18839	1.15	5.39	1.9	3.17	1	3390	0	0	32	0	1	2	18.45	4.65	38	12.2	2	50	1	1	1	7	1	1	2	1	1	1	2	1	1	1	1	1	12
12	1	268	6.43824	1.40851	0.82	1.22	2.82	1.35	1.19	0	4000	0	0	28	1	1	1	25.3906	4.85	40	12	1	50	2	1	2	9	2	1	2	1	1	1	1	2	1	2	1	2	10
44	1	333	0	1.95997	0.142953	1.98	5.86	2.09	3.33	0	4040	0	1	27	0	1	2	31.25	5.16	38	28	2	51	1	2	2	5	1	1	2	1	1	1	1	2	1	1	1	1	17
47	1	337	2.67122	4.47259	0.985355	1.66	6.37	2.99	2.92	1	4110	0	0	28	0	0	2	23.3377	4.68	39	24	2	51	1	2	1	8	1	1	2	1	2	2	2	2	1	2	1	2	11
7	1	343	2.17598	2.7007	1.93	1.99	5.77	1.61	3.66	1	4100	0	0	43	0	1	1	20.8117	5.16	39	12.4	2	50	2	1	1	10	1	1	2	1	1	1	1	1	1	1	1	1	13
39	1	388	2.40188	0.656712	0.96285	0.76	3.17	1.38	1.53	1	4000	1	0	19	0	0	1	20.202	4.14	40	39	2	51	2	1	1	10	1	1	2	1	2	2	1	2	1	2	1	2	10
40	1	392	0.342004	0.120241	1.02042	1.39	5.7	2.44	2.92	0	4080	0	1	31	0	1	2	25.6369	4.63	39	13	2	50	1	2	1	9	1	1	2	1	2	2	1	2	2	2	2	2	10
11	0	394	15.4371	2.35517	1.19	1.81	3.37	1.42	1.46	0	3650	0	0	34	0	1	2	18.026	4.08	39	15.5	2	50	2	2	1	8	1	1	2	1	2	2	2	2	1	1	1	2	12
18	0	402	0.33064	0.0245608	0.86	1.01	4.38	1.76	2.31	0	3450	0	0	23	0	0	2	22.1828	4.57	40	15.9	1	50	1	2	1	7	1	1	2	1	2	1	1	2	1	1	1	2	11
17	0	403	0.179348	0.0247102	1.28	1.29	5.27	2.02	2.97	1	3680	0	0	35	0	1	1	22.6562	4.31	40	18.5	1	50	1	1	1	9	1	1	2	2	2	2	1	2	2	2	1	2	13
21	0	470	1.96337	1.11922	0.55	1.32	5.2	2.01	2.85	1	3280	0	0	30	0	1	1	20.5457	4.76	38	14	2	51	1	1	1	10	1	1	2	1	1	1	1	2	1	2	1	2	8
22	1	495	2.65277	0.0132917	0.92	2.1	5.03	1.35	3.15	1	4250	0	0	33	0	1	1	29.2969	5	40	12.5	2	52	1	2	2	12	1	1	2	2	2	1	2	2	2	2	1	1	9
21	1	549	0.22324	0.467326	1.42	2.62	4.07	1.59	1.98	1	4070	0	0	27	0	0	2	24.2188	5.28	39	18	1	52	1	2	1	8	1	1	2	1	1	1	2	2	2	2	1	2	9
40	0	591	0.0637212	0.0120402	0.96105	0.85	5.61	3.04	2.34	1	2880	0	0	26	0	0	1	18.8271	4.49	36	14.5	2	49	2	2	2	7	1	1	2	1	2	2	1	2	2	2	1	2	9
36	1	114	0.00860532	0.00553705	1.53175	2.26	3.53	1	2.06	1	4370	0	1	31	0	1	2	22.9421	5.23	39	12	2	51	1	2	1	9	1	1	2	1	1	1	1	2	1	2	1	2	10
10	1	95	0.00628644	0.0559068	1.2	1.32	4.18	1.13	2.74	0	4230	0	0	26	0	1	1	29.2969	4.76	40	0.5	1	51	2	2	2	9	1	1	2	1	2	1	1	2	1	2	1	2	7
3	0	96	0.0423205	0.127038	1.92	1.18	2.88	1.39	1.22	1	3050	0	0	26	0	1	1	22.8624	4.24	37	21	1	50	1	2	1	8	1	1	2	2	1	1	1	2	2	1	1	1	11
46	1	119	0.124928	0.035594	0.380872	1.2	3.71	1.32	2.1	1	4120	0	0	30	0	1	2	23.9838	5.06	39	16.5	1	53	1	2	2	7	1	1	2	1	1	1	1	2	1	2	2	2	9
37	1	143	0.00888138	0.00281367	0.900577	0.79	3.23	0.98	2.1	1	4440	1	0	24	0	0	2	20.5499	5.15	40	23	2	52	2	2	2	7	1	1	2	1	2	1	2	2	1	2	1	2	10
8	0	144	0.135255	0.221186	0.79	2.12	5.83	1.29	3.93	1	3800	0	0	30	0	1	1	28.0404	5.17	40	11	2	50	1	1	2	12	1	1	2	1	1	1	2	1	1	2	1	1	9
46	0	146	0.239124	0.0255201	1.04372	0.77	3.6	1.92	1.52	1	3660	0	0	25	0	0	1	16.4062	4.86	39	20.5	1	51	1	2	1	8	2	1	2	2	2	1	1	2	2	2	2	2	10
6	0	161	0.189684	0.066677	1.34	0.95	3.75	1.77	1.67	0	3000	0	0	28	0	1	1	20.4467	4.78	38	7	2	50	2	2	1	7	1	1	2	1	2	2	1	2	2	1	2	2	9
12	0	187	0.494043	0.0501537	0.86	1.46	3.81	1.42	2.05	0	3870	0	0	29	0	1	1	22.1893	4.47	41	13	2	50	1	2	1	10	1	1	2	2	2	2	1	2	1	2	1	2	10
7	0	347	0.10118	0.366021	0.87	1.46	4.35	1.71	2.24	1	3750	0	0	27	0	1	1	29.2421	4.39	38	18	2	50	2	1	1	8	1	1	2	1	2	1	1	1	1	1	1	2	12
19	1	459	0.0176877	0.0223151	1.73	1.31	4.64	1.87	2.46	1	4040	0	0	28	0	1	1	19.9481	4.7	39	16	1	52	2	2	2	8	1	1	2	1	1	1	1	2	2	2	1	1	11
20	1	542	0.0309566	0.0137207	0.71	2.38	4.88	1.64	2.68	1	4450	0	0	29	0	1	2	22.5466	4.81	39	18.7	1	51	1	2	2	9	1	1	2	2	2	2	2	2	1	1	1	1	10
23	0	643	0.172739	0.0431848	0.85	2.39	3.6	1.28	1.8	0	2650	0	0	29	0	1	2	19.1953	4.78	39	15	1	49	2	2	2	9	1	1	2	1	1	1	1	2	2	2	2	2	13
2	1	22	1.22529	4.42804	0.51	1.14	3.69	1.21	2.14	1	4050	0	0	23	0	1	1	26.6667	5.23	40	16.5	2	50	1	1	2	8	1	1	2	2	1	1	1	1	1	1	1	2	13
1	1	29	0	1.14817	1.16	1.54	3.71	1.38	1.98	1	4200	0	0	34	0	1	1	27.7344	4.8	40	11	1	53	2	2	2	10	2	1	2	1	1	1	1	2	1	2	1	1	14
4	0	30	1.41748	1.10957	0.76	0.87	3.49	1.38	1.68	0	3530	0	0	26	0	0	2	19.5717	4.49	40	12.7	1	51	1	2	2	8	1	1	2	1	1	1	1	2	1	2	1	2	9
14	0	173	1.39072	2.16282	1.35	1.25	3.45	1.39	1.54	1	3600	0	0	23	0	1	1	20.9644	4.26	38	17.5	2	21	1	1	1	8	1	1	2	1	1	1	1	1	2	1	1	2	10
16	0	261	19.7211	12.8728	1.72	1.28	3.8	1.43	2.01	1	3400	0	0	24	0	1	1	24.2188	4.44	39	11.7	1	50	1	2	1	8.5	1	1	2	1	2	1	2	2	2	2	2	2	11
9	0	273	0.779052	12.3519	1.02	1.38	3.85	1.47	1.94	0	3330	0	0	31	0	1	2	23.4375	4.39	38	24	1	50	2	2	2	8	1	1	2	1	1	1	1	1	1	1	1	2	11
45	0	327	0.330211	0.517393	0.763538	1.9	5.74	1.88	3.37	0	3150	0	0	23	0	1	1	21.4903	5.05	40	20	1	50	2	1	1	2	1	1	2	1	2	2	1	2	2	2	2	2	18
13	1	172	12.9979	0.339445	1.37	1.41	4.4	1.61	2.46	1	4500	0	0	24	0	1	1	21.6713	4.58	40	9.5	1	50	2	2	2	9	1	1	2	1	2	1	1	2	1	2	1	2	15
42	1	275	1.9611	0.318493	0.552777	2.48	5.53	1.47	3.45	1	4015	0	0	31	0	1	1	18.1641	4.2	40	13.5	1	50	2	1	2	10	1	1	2	1	1	1	1	2	1	2	1	2	17
36	0	319	0	1.24545	0.46956	1.67	6.18	2.64	3.15	0	3100	0	0	25	1	1	1	18.8271	5.17	39	10	1	49	2	2	2	9	1	1	2	2	2	1	1	1	1	1	1	2	16
43	1	278	0.131822	2.86659	0.389123	2.13	4.41	1.8	2.21	1	4275	0	0	28	0	1	1	23.634	4.46	40	16	1	51	2	2	1	8	1	1	2	1	1	1	1	1	1	2	2	2	17
15	1	192	5.02418	1.51528	1.42	0.95	3.85	1.68	1.93	1	4250	0	0	24	0	1	1	22.0604	4.91	39	19.8	1	51	1	1	1	10	1	1	2	1	1	1	1	2	1	2	2	2	11
42	0	379	0	0.777007	1.26935	4.21	5.57	1.92	2.78	1	3300	0	0	24	0	1	1	23.5556	4.41	39	11	1	50	1	1	2	10	1	1	2	1	2	1	1	2	2	2	2	2	18
14	1	201	0.0269389	4.33566	2.06	1.15	3.92	1.27	2.34	0	4350	0	0	28	0	1	1	22.8624	4.89	39	11	2	52	2	1	1	8	2	1	2	1	1	1	1	2	1	2	2	2	11
47	0	428	10.7716	10.5642	0.62818	1.74	4.64	1.78	2.52	1	3520	0	0	26	0	0	2	20.83	4.26	39	12.5	2	50	2	2	2	9	1	1	2	1	2	2	1	2	1	2	2	2	11
44	0	287	0.332812	6.77788	0.350298	2.07	5.56	2.12	3.2	0	2950	0	0	21	1	0	1	24.4444	4.29	39	18	1	50	2	1	2	10	1	1	2	1	1	1	1	2	1	2	2	2	17
17	1	364	1.44894	0.223433	2.29	1.39	2.45	0.98	1.22	0	4090	0	0	22	1	1	1	21.2891	4.78	40	16.5	1	51	1	2	2	8	1	1	2	2	2	2	2	2	1	2	2	2	12
35	1	320	0	0.780967	1.2711	1.45	5.55	2.23	2.98	1	4340	0	1	23	0	0	1	20.3125	4.63	39	16	1	53	2	2	2	8.5	1	1	2	1	2	1	1	2	1	2	2	2	16
43	0	227	0.509328	0.660975	1.07705	1.54	5.51	2.24	2.92	1	3100	0	0	25	0	1	1	18.7328	4.41	41	17	1	50	2	1	1	9	1	1	2	2	2	2	2	2	2	2	2	2	17
16	1	208	0	0.932764	2.26	1.79	4.26	1.2	2.69	1	4200	0	0	23	0	1	1	28.0102	4.71	41	14.8	1	50	2	1	1	7.5	1	1	1	1	1	1	1	1	1	1	1	2	11
13	0	222	0.745377	0.0123551	1.58	1.69	3.69	1.43	1.97	0	3500	0	0	30	0	1	1	24.7676	4.16	38	12	2	50	1	1	1	8.5	1	1	2	1	1	1	1	2	2	2	1	2	15
35	0	307	1.6245	0.909618	0.89319	1.23	6.89	1.88	4.79	1	3680	0	0	23	0	0	2	18.5108	4.44	40	17	1	50	2	1	1	7	1	1	2	2	1	1	2	2	2	2	1	2	16
11	1	390	0.637649	2.09822	1.59	1.32	4.08	1.39	2.43	1	4030	0	0	25	0	0	2	22.0386	3.47	40	12	1	52	2	1	1	10	1	1	2	1	1	1	1	2	1	2	1	2	12
19	0	450	0	7.86711	1.98	0.64	3.27	1.72	1.44	1	3600	0	0	23	0	1	1	18.4265	4.61	39	15	1	51	1	1	1	7.5	1	1	2	1	2	1	1	2	1	1	1	2	11
18	1	430	8.40744	0.609557	1.51	0.99	3.08	1.28	1.59	1	4010	0	0	27	0	0	2	20.3125	4.44	40	18	2	51	1	2	1	9	1	1	2	1	2	2	2	2	1	2	1	2	11
22	0	480	0	2.10916	2.57	1.34	4.53	2.14	2.07	0	3625	0	0	25	0	1	1	22.8624	4.83	40	11	1	50	2	1	2	10	1	1	2	1	2	2	1	2	2	2	2	2	9
45	1	354	0	5.70674	1.08277	3.3	6.49	2.03	3.75	1	4140	0	0	24	0	1	1	22.7615	5.11	38	27.4	2	51	2	1	1	10	1	1	2	1	1	1	1	2	2	2	2	2	18
25	1	783	0.0838381	0.348605	1.23	1.76	6.43	1.97	4.1	0	4050	0	0	31	0	0	2	26.0262	5.21	41	9.5	2	50	2	2	1	7.5	1	1	2	2	2	2	1	2	2	2	1	2	11
27	0	956	3.20428	4.85341	2.11	1.31	3.78	1.86	1.67	1	3580	0	0	27	0	0	2	20.2848	4.79	40	22	1	50	1	2	1	8	1	1	2	2	1	2	1	2	2	2	2	2	10
33	0	968	13.0808	5.93535	0.80798	0.89	4.29	1.77	2.16	0	3130	0	0	24	0	0	2	22.3081	4.8	39	18.2	1	49	1	2	2	7	1	1	2	1	2	1	1	2	1	2	1	2	8
31	1	1006	1.65123	1.23342	0.418208	1.22	5.33	1.37	3.76	0	4100	0	0	26	0	0	1	28.5156	4.61	41	17	2	50	2	1	1	10	1	1	2	1	1	1	2	2	1	2	2	2	7
34	0	1098	1.74917	4.52944	0.484546	1.1	4.3	1.77	2.13	1	3300	0	0	28	0	1	1	20.4294	4.35	39	27.4	2	50	1	2	1	8	1	1	1	1	1	1	1	1	1	1	1	2	7
25	0	821	0.232922	0.169341	2.32	1.31	4.54	1.75	2.47	1	3600	0	0	26	0	1	1	18.902	4.81	40	19.9	1	50	1	1	2	8	1	1	2	1	1	1	2	2	2	2	1	2	11
24	1	826	1.07239	0.00261133	1.59	0.92	4.31	1.24	2.81	1	4600	0	0	25	0	0	1	15.7785	5.42	41	10.9	2	53	1	2	2	10	1	1	2	1	1	1	1	1	1	2	1	2	12
26	1	856	0.725728	0.159836	1.42	0.78	3.44	1.64	1.61	1	4190	0	0	26	0	1	1	20.1951	4.67	39	18	1	53	1	1	1	10	1	1	2	1	1	1	1	2	1	2	1	2	12
27	1	920	0.0780657	0.155214	1.39	1.69	3.3	1.5	1.52	0	4240	0	0	23	1	1	1	24.8016	5.03	41	23	1	51	1	1	2	8	1	1	2	1	1	1	1	2	1	2	1	2	9
26	0	917	5.25673	0.207043	1.89	1.25	4.16	1.69	2.11	0	3300	0	0	28	0	1	2	18.5911	4.95	38	17	1	50	1	1	1	8	1	1	2	1	2	2	1	2	2	2	1	2	13
28	1	977	0.111523	0.641268	1.65	2.28	4.88	1.27	3.11	1	4060	0	0	27	0	1	2	25.7117	4.56	39	22.1	1	21	1	2	1	7	1	1	2	1	1	2	2	2	2	1	2	2	11
30	1	974	0.469761	1.22774	1.28972	1.04	8.51	1.84	6.33	1	4160	0	0	24	0	0	2	23.3887	4.99	40	17	2	52	2	2	1	8	1	1	2	2	2	2	1	2	2	2	2	2	10
30	0	1019	0.232183	0.104821	1.23446	0.95	3.92	1.61	2.15	1	3450	0	0	20	0	0	1	20.9042	4.92	39	8	1	50	2	1	2	9	1	1	2	1	1	1	1	2	2	2	2	2	10
34	1	1109	0.116899	0.0895808	0.747435	1.98	4.09	1.74	2.04	1	4200	0	0	32	0	1	1	20.8117	4.24	39	16.5	2	51	1	2	1	5.5	1	1	2	2	1	1	2	2	2	2	2	2	8
29	0	1115	0.0403977	0.120297	1.57	2.41	5.78	2.17	3.12	1	3320	0	0	25	0	0	2	20.7612	4.1	37	30	1	50	2	2	2	7	1	1	2	1	2	2	2	2	2	2	2	2	15
31	0	1104	0.2076	0.0318919	0.786293	1.22	4.8	2.1	2.54	0	2860	0	0	26	0	1	2	18.7305	4.53	38	13	1	49	2	2	1	8	1	1	2	1	2	1	1	2	2	2	1	2	7
24	0	819	3.36359	1.27074	2.14	1.5	4.5	1.5	2.53	1	3390	0	0	23	0	0	1	22.8624	4.66	39	18.1	2	50	2	2	1	8.5	1	1	2	2	2	2	2	2	2	2	2	2	12
23	1	697	2.75745	8.13044	0.58	1.44	5.16	2.41	2.41	1	4250	0	0	33	0	0	1	24.7676	5.07	39	19	2	52	1	1	2	8	1	2	2	1	1	1	1	2	1	2	1	2	14
41	0	932	4.45111	0.592546	1.2349	1.24	4.91	2.38	2.23	1	2900	0	0	26	0	0	2	20.1172	4.56	37	13.5	2	50	1	1	1	7	1	1	1	2	1	1	1	1	2	2	2	2	16
41	1	896	12.8988	1.06314	0.67725	3.9	8.33	3.98	3.81	1	4150	0	1	29	0	0	2	23.1473	5.19	39	25.5	2	50	2	1	2	8	2	1	2	2	2	1	2	2	2	2	2	2	16
28	0	1043	6.27486	4.5284	0.77	2.08	5.18	2.09	2.77	1	3460	0	0	25	0	1	1	21.2306	4.82	39	15.5	1	50	2	2	2	8.5	1	1	2	1	1	1	2	1	2	2	2	2	12
32	1	1041	6.94231	2.37841	0.811408	3.07	4.85	1.46	2.81	1	4000	0	0	31	0	1	1	23.0681	4.64	40	6	1	50	2	2	2	9.5	1	1	2	1	1	1	1	2	1	1	1	2	12
32	0	930	5.64217	0.848704	1.08382	3.59	3.59	1	2.23	1	2900	0	0	19	1	0	1	17.0874	5.59	39	18.5	1	48	2	2	2	11	1	1	2	1	1	1	1	2	1	1	2	2	11
33	1	1039	6.63935	2.13268	1.84029	1.93	4.97	2.12	2.46	0	4100	0	0	25	0	1	1	28.2284	5.54	38	-1	2	50	2	2	2	6.5	1	1	2	2	1	1	1	2	2	2	1	2	9
29	1	1031	0.695963	0.0754327	1.65	3.14	5.56	1.71	3.32	0	4055	0	0	30	0	1	1	26.3465	4.45	41	24	1	50	2	1	2	10	1	1	2	2	2	2	2	2	2	2	2	2	16
20	0	485	3.11426	4.62408	0.83	1.01	3.28	1.26	1.79	0	3410	1	0	15	1	0	1	20.8117	4.8	39	30	2	52	1	1	2	10	1	1	2	1	1	1	1	2	1	2	1	2	9
