# Supplementary material for: Serum lncRNA H19/miR-675 /PPARα expression before middle gestation and their associations with macrosomia risk in singleton pregnancies without gestational diabetes mellitus: a preliminary study
Source: PeerJ. 2026 Feb 16;14:e20793. doi: 10.7717/peerj.20793 (PMC12919319; doi:10.7717/peerj.20793)
Supplement: Supplemental Information 3 [file peerj-14-20793-s003.xlsx]

## Sheet: 0
	Well	Fluor	Target	Content	Sample	Cq	SQ	SDs
	A01	SYBR	H19	Unkn	172	36.2736
	A02	SYBR	H19	Unkn	172
	A03	SYBR	H19	Unkn	172
	A04	SYBR	H19	Unkn	172	38.2993
	A05	SYBR	39-3p	Unkn	172	25.1528		0.156194
	A06	SYBR	39-3p	Unkn	172	25.07
	A07	SYBR	39-3p	Unkn	172	25.3722
	A08	SYBR	H19	NTC		36.2296
	A09	SYBR		Unkn
	A10	SYBR		Unkn
	A11	SYBR		Unkn
	A12	SYBR		Unkn
	B01	SYBR	H19	Unkn	364	33.5185		0.805405
	B02	SYBR	H19	Unkn	364	32.0414
	B03	SYBR	H19	Unkn	364	33.7648
	B04	SYBR	H19	Unkn	364	33.6356
	B05	SYBR	39-3p	Unkn	364	18.0845		0.586595
	B06	SYBR	39-3p	Unkn	364	17.8689
	B07	SYBR	39-3p	Unkn	364	18.9754
	B08	SYBR	H19	NTC		37.4232
	B09	SYBR		Unkn
	B10	SYBR		Unkn
	B11	SYBR		Unkn
	B12	SYBR		Unkn
	C01	SYBR	H19	Unkn	430	34.5087		0.403332
	C02	SYBR	H19	Unkn	430	34.4349
	C03	SYBR	H19	Unkn	430	33.656
	C04	SYBR	H19	Unkn	430	34.4355
	C05	SYBR	39-3p	Unkn	430	24.3677
	C06	SYBR	39-3p	Unkn	430	24.3522
	C07	SYBR	39-3p	Unkn	430	24.4447
	C08	SYBR	H19	NTC		35.2195
	C09	SYBR		Unkn
	C10	SYBR		Unkn
	C11	SYBR		Unkn
	C12	SYBR		Unkn
	D01	SYBR	H19	Unkn	274	35.8769
	D02	SYBR	H19	Unkn	274	37.4313
	D03	SYBR	H19	Unkn	274	35.5786
	D04	SYBR	H19	Unkn	274	43.4267
	D05	SYBR	39-3p	Unkn	274	23.2042
	D06	SYBR	39-3p	Unkn	274	23.1616
	D07	SYBR	39-3p	Unkn	274	23.2793
	D08	SYBR	H19	Unkn	402	33.0655
	D09	SYBR		Unkn
	D10	SYBR		Unkn
	D11	SYBR		Unkn
	D12	SYBR		Unkn
	E01	SYBR	H19	Unkn	222	33.5222		0.671263
	E02	SYBR	H19	Unkn	222	32.4907
	E03	SYBR	H19	Unkn	222	32.4974
	E04	SYBR	H19	Unkn	222	31.908
	E05	SYBR	39-3p	Unkn	222	22.7735
	E06	SYBR	39-3p	Unkn	222	22.8607
	E07	SYBR	39-3p	Unkn	222	22.9905
	E08	SYBR	H19	Unkn	402	33.3573
	E09	SYBR		Unkn
	E10	SYBR		Unkn
	E11	SYBR		Unkn
	E12	SYBR		Unkn
	F01	SYBR	H19	Unkn	403	31.84		0.557023
	F02	SYBR	H19	Unkn	403	31.1252
	F03	SYBR	H19	Unkn	403	32.4398
	F04	SYBR	H19	Unkn	403	32.0952
	F05	SYBR	39-3p	Unkn	403	13.4784
	F06	SYBR	39-3p	Unkn	403	13.566
	F07	SYBR	39-3p	Unkn	403	13.5494
	F08	SYBR	H19	Unkn	402	33.008
	F09	SYBR		Unkn
	F10	SYBR		Unkn
	F11	SYBR		Unkn
	F12	SYBR		Unkn
	G01	SYBR	H19	Unkn	393	32.5568		1.0068
	G02	SYBR	H19	Unkn	393	34.7272
	G03	SYBR	H19	Unkn	393	33.074
	G04	SYBR	H19	Unkn	393	32.6608
	G05	SYBR	39-3p	Unkn	402	14.8457
	G06	SYBR	39-3p	Unkn	402	14.7554
	G07	SYBR	39-3p	Unkn	402	14.8184
	G08	SYBR	39-3p	NTC	39-3p	37.6235
	G09	SYBR		Unkn
	G10	SYBR		Unkn
	G11	SYBR		Unkn
	G12	SYBR		Unkn
	H01	SYBR	H19	Unkn	402	32.4265
	H02	SYBR		Unkn		39.9634
	H03	SYBR	39-3p	NTC	39-3p	38.229
	H04	SYBR	39-3p	NTC	39-3p	39.3934
	H05	SYBR	39-3p	Unkn	393	15.4304		0.256685
	H06	SYBR	39-3p	Unkn	393	15.8298
	H07	SYBR	39-3p	Unkn	393	15.3507
	H08	SYBR	39-3p	NTC	39-3p	37.6493
	H09	SYBR		Unkn
	H10	SYBR		Unkn
	H11	SYBR		Unkn
	H12	SYBR		Unkn

## Sheet: Run Information
File Name	admin_2023-04-22 17-21-24_CT006516.pcrd
Created By User	admin
Notes
ID
Run Started	04/22/2023 09:21:35 UTC
Run Ended	04/22/2023 10:45:36 UTC
Sample Vol	20
Lid Temp	105
Protocol File Name	H19-qpcr.prcl
Plate Setup File Name	Quick Plate_96 wells_SYBR Only.pltd
Base Serial Number	CT006516
Optical Head Serial Number	785BR8962
CFX Manager Version	3.1.1517.0823.
