# Supplementary material for: Serum lncRNA H19/miR-675 /PPARα expression before middle gestation and their associations with macrosomia risk in singleton pregnancies without gestational diabetes mellitus: a preliminary study
Source: PeerJ. 2026 Feb 16;14:e20793. doi: 10.7717/peerj.20793 (PMC12919319; doi:10.7717/peerj.20793)
Supplement: Supplemental Information 4 [file peerj-14-20793-s004.xlsx]

## Sheet: 0
	Well	Fluor	Target	Content	Sample	Cq	SQ	SDs
	A01	SYBR	675	Unkn	577	30.8107		0.150701
	A02	SYBR	675	Unkn	577	31.0955
	A03	SYBR	675	Unkn	577	31.0385
	A04	SYBR	39-3p	Unkn	577	23.263
	A05	SYBR	39-3p	Unkn	577	23.2064
	A06	SYBR	39-3p	Unkn	577	23.35
	A07	SYBR	675	Unkn	428	31.2476
	A08	SYBR	39-3p	Unkn	428	24.6246
	A09	SYBR		Unkn
	A10	SYBR		Unkn
	A11	SYBR		Unkn
	A12	SYBR		Unkn
	B01	SYBR	675	Unkn	896	31.1404		0.376702
	B02	SYBR	675	Unkn	896	31.2156
	B03	SYBR	675	Unkn	896	31.8272
	B04	SYBR	39-3p	Unkn	896	23.2368
	B05	SYBR	39-3p	Unkn	896	23.5868
	B06	SYBR	39-3p	Unkn	896	23.5931
	B07	SYBR	675	Unkn	428	31.1616
	B08	SYBR	39-3p	Unkn	428	23.4165
	B09	SYBR		Unkn
	B10	SYBR		Unkn
	B11	SYBR		Unkn
	B12	SYBR		Unkn
	C01	SYBR	675	Unkn	119	31.3661		0.0673247
	C02	SYBR	675	Unkn	119	31.493
	C03	SYBR	675	Unkn	119	31.3906
	C04	SYBR	39-3p	Unkn	119	15.4953
	C05	SYBR	39-3p	Unkn	119	16.058
	C06	SYBR	39-3p	Unkn	119	16.2788
	C07	SYBR	675	Unkn	428	31.1303
	C08	SYBR	39-3p	Unkn	428	23.726
	C09	SYBR		Unkn
	C10	SYBR		Unkn
	C11	SYBR		Unkn
	C12	SYBR		Unkn
	D01	SYBR	675	Unkn	337	30.7854		0.342442
	D02	SYBR	675	Unkn	337	31.4461
	D03	SYBR	675	Unkn	337	31.2719
	D04	SYBR	39-3p	Unkn	337	22.7012
	D05	SYBR	39-3p	Unkn	337	22.5413
	D06	SYBR	39-3p	Unkn	337	22.7765
	D07	SYBR	675	Unkn	393	30.2885
	D08	SYBR	39-3p	Unkn	393	17.3169
	D09	SYBR		Unkn
	D10	SYBR		Unkn
	D11	SYBR		Unkn
	D12	SYBR		Unkn
	E01	SYBR	675	Unkn	274	31.3728		0.203561
	E02	SYBR	675	Unkn	274	31.6005
	E03	SYBR	675	Unkn	274	31.1943
	E04	SYBR	39-3p	Unkn	274	24.3901
	E05	SYBR	39-3p	Unkn	274	24.4977
	E06	SYBR	39-3p	Unkn	274	24.3893
	E07	SYBR	675	Unkn	393	30.7249
	E08	SYBR	39-3p	Unkn	393	17.3913
	E09	SYBR		Unkn
	E10	SYBR		Unkn
	E11	SYBR		Unkn
	E12	SYBR		Unkn
	F01	SYBR	675	Unkn	585	31.7765		0.359915
	F02	SYBR	675	Unkn	585	32.061
	F03	SYBR	675	Unkn	585	31.3461
	F04	SYBR	39-3p	Unkn	585	15.6772
	F05	SYBR	39-3p	Unkn	585	15.8436
	F06	SYBR	39-3p	Unkn	585	16.2576
	F07	SYBR	675	Unkn	393	30.904
	F08	SYBR	39-3p	Unkn	393	16.8907
	F09	SYBR		Unkn
	F10	SYBR		Unkn
	F11	SYBR		Unkn
	F12	SYBR		Unkn
	G01	SYBR	675	Unkn	932	31.3715		0.228762
	G02	SYBR	675	Unkn	932	31.7447
	G03	SYBR	675	Unkn	932	31.3289
	G04	SYBR	39-3p	Unkn	932	22.5348
	G05	SYBR	39-3p	Unkn	932	22.8611
	G06	SYBR	39-3p	Unkn	932	22.7494
	G07	SYBR	675	NTC		36.5671
	G08	SYBR	39-3p	NTC
	G09	SYBR		Unkn
	G10	SYBR		Unkn
	G11	SYBR		Unkn
	G12	SYBR		Unkn
	H01	SYBR	675	Unkn	146	31.2493		0.199312
	H02	SYBR	675	Unkn	146	31.3556
	H03	SYBR	675	Unkn	146	31.6352
	H04	SYBR	39-3p	Unkn	146	15.5328
	H05	SYBR	39-3p	Unkn	146	15.4273
	H06	SYBR	39-3p	Unkn	146	15.4366
	H07	SYBR	675	NTC		36.5672
	H08	SYBR	39-3p	NTC
	H09	SYBR		Unkn
	H10	SYBR		Unkn
	H11	SYBR		Unkn
	H12	SYBR		Unkn

## Sheet: Run Information
File Name	admin_2023-04-23 13-55-23_CT006516.pcrd
Created By User	admin
Notes
ID
Run Started	04/23/2023 05:55:33 UTC
Run Ended	04/23/2023 07:10:26 UTC
Sample Vol	20
Lid Temp	105
Protocol File Name	675-qpcr.prcl
Plate Setup File Name	Quick Plate_96 wells_SYBR Only.pltd
Base Serial Number	CT006516
Optical Head Serial Number	785BR8962
CFX Manager Version	3.1.1517.0823.
