# Supplementary material for: Serum lncRNA H19/miR-675 /PPARα expression before middle gestation and their associations with macrosomia risk in singleton pregnancies without gestational diabetes mellitus: a preliminary study
Source: PeerJ. 2026 Feb 16;14:e20793. doi: 10.7717/peerj.20793 (PMC12919319; doi:10.7717/peerj.20793)
Supplement: Supplemental Information 8 [file peerj-14-20793-s008.xlsx]

## Sheet: Sheet1
CODEBOOK
variables	variable type	Label	Variable assignment
subgroup	Discrete	pair match number
macro	catogorical	macrosomia or not	0= normal birthweight 1= macrosomia
H19	continuous	lncRNA H29 level
miR675	continuous	miRNA 675 level
PPARA	continuous	PPARalpha level
TG	continuous	TG level,mmol/L
TC	continuous	TC level,mmol/L
HDL.C	continuous	HDL.C level,mmol/L
LDL.C	continuous	LDL.C level,mmol/L
sex	continuous	sex	0=girls 1=boys
birthweight	continuous	g
preg_hypertension	catogorical	hypertension during pregnancy	0=no hypertension 1=hypertension
GDM	catogorical	GDM	0= non-GDM 1=GDM
age	continuous	years
ethni	catogorical	ethnicity	0= Han 1=minority
parity	Discrete
edu	catogorical	education	1=Receiving ≤ 12 years' education 2=Receiving > 12 years' education
preg_BMI	continuous	BMI before pregnancy,kg/m2
FBG	continuous	mmol/L
ges_wks	continuous	gestational weeks
weight_inc	continuous	weight gain during pregnancy，kg
delivery	catogorical		1=Vaginal delivery; 2=assisted delivery;
length	continuous	newborn length,cm
sample_wk	continuous	gestational weeks at sample collection
income		family income per month
work	catogorical	work during pregnancy	1= not working 2=working
excise	catogorical	physical exercise during pregnancy per week	1= < 3 frequencies of physical exercise during pregnancy per week 2= ≥ 3 frequencies of physical exercise during pregnancy per week
sleep	continuous	hours
drink	catogorical	Drinking before pregnancy	1=Drinking before pregnancy 2= not drinking before pregnancy
smoke	catogorical	Smoking before pregnancy	1=Smoking before pregnancy 2= not smoking before pregnancy
grain	catogorical	cereals intake per week	1=> 7 frequencies of cereals intake per week 2= ≤ 7 frequencies of cereals intake per week
nut	catogorical	nuts intake per week	1=> 7 frequencies of nuts intake per week 2= ≤ 7 frequencies of nuts intake per week
meat	catogorical	meats intake per week	1=> 7 frequencies of meats intake per week 2= ≤ 7 frequencies of meats intake per week
seafood	catogorical	seafood intake per week	1=> 7 frequencies of seafood intake per week 2= ≤ 7 frequencies of seafood intake per week
bean	catogorical	soybean intake per week	1=> 7 frequencies of soybean intake per week 2= ≤ 7 frequencies of soybean intake per week
vegetable	catogorical	vegetable intake per week	1=> 7 frequencies of vegetable intake per week 2= ≤ 7 frequencies of vegetable intake per week
egg	catogorical	egg per day	1=> 1 egg per day 2= ≤ 1 egg per day
fruit	catogorical	fruits intake per week	1=> 7 frequencies of fruits intake per week 2= ≤ 7 frequencies of fruits intake per week
milk	catogorical	milk and milk products intake per week	1=> 7 frequencies of milk and milk products intake per week 2= ≤ 7 frequencies of milk and milk products intake per week
acid	catogorical	folic acid intake per week	1=> 7 frequencies of folic acid intake per week 2= ≤ 7 frequencies of folic acid intake per week
